# Supplementary material for: Venous thromboembolism prophylaxis in sickle cell disease: a multicenter cohort study of adolescent inpatients
Source: PubMed Central journal article supplement — Blood Adv. 2022 Sep 19;7(9):1762–8. doi: 10.1182/bloodadvances.2022007802 (PMC10182172; doi:10.1182/bloodadvances.2022007802), 2022-09-19
Supplement: BLOODA_ADV-2022-007802-mmc1.pdf [file BLOODA_ADV-2022-007802-mmc1.pdf]

| Hospital ID | 2010 | 2011 | 2012 | 2013 | 2014 | 2015 | 2016 | 2017 | 2018 | 2019 | 2020 | 2021 |
|-------------|------|------|------|------|------|------|------|------|------|------|------|------|
| 1           |      | 0.0  | 0.0  | 0.0  | 0.0  | 0.0  | 0.0  | 0.0  | 0.0  | 0.0  | 0.0  | 0.0  |
| 2           | 0.0  | 0.0  | 0.0  | 0.0  | 0.0  | 0.0  | 1.5  | 0.0  | 0.0  | 0.0  | 0.0  | 5.7  |
| 3           |      |      |      |      | 11.1 | 0.0  | 0.0  | 0.0  | 0.0  | 0.0  | 0.0  | 0.0  |
| 4           |      |      |      | 0.0  | 0.0  | 0.0  | 0.0  | 0.0  | 0.0  | 20.0 | 0.0  | 0.0  |
| 5           | 0.0  | 0.0  | 25.0 | 25.0 | 0.0  | 0.0  | 0.0  | 0.0  | 0.0  | 0.0  | 0.0  | 0.0  |
| 6           | 0.0  | 0.0  | 0.0  | 0.0  | 0.0  | 1.1  | 0.0  | 0.0  | 0.0  | 0.0  | 1.1  | 0.0  |
| 7           |      |      |      |      |      |      |      | 0.0  | 2.1  |      |      |      |
| 8           | 0.0  | 0.0  | 4.4  | 0.0  | 0.0  | 0.0  | 0.0  | 7.1  | 0.0  | 0.0  | 0.0  | 0.0  |
| 9           | 2.0  | 0.9  | 1.6  | 0.0  | 0.3  | 0.6  | 0.3  | 0.4  | 0.0  | 0.4  | 2.8  | 5.8  |
| 10          | 0.0  | 1.7  | 0.0  | 2.5  | 0.0  | 0.0  | 0.0  | 0.0  | 0.0  | 0.8  | 3.4  |      |
| 11          | 0.0  | 0.0  | 0.0  | 0.0  | 0.0  | 0.0  | 3.9  | 0.0  | 0.0  | 0.0  | 0.0  | 0.0  |
| 12          |      |      |      | 0.0  | 0.0  | 0.0  | 0.0  | 0.0  | 0.0  | 0.0  | 0.0  | 0.0  |
| 13          | 5.7  | 0.9  | 0.0  | 0.0  | 0.0  | 0.7  | 0.0  | 0.0  | 0.0  | 1.8  | 5.6  | 8.6  |
| 14          | 0.0  | 0.0  | 1.0  | 0.0  | 2.4  | 0.0  | 0.0  | 0.0  | 0.0  | 4.4  | 6.3  | 2.0  |
| 15          | 2.1  | 2.1  | 0.0  | 6.2  | 0.0  | 3.2  | 0.0  | 6.4  | 0.0  | 5.9  |      |      |
| 16          | 0.0  | 0.0  | 0.0  | 1.8  | 0.0  | 0.0  | 0.0  | 0.0  | 0.0  | 0.0  | 2.0  | 10.5 |
| 17          |      |      | 0.0  | 0.0  | 0.0  | 0.0  | 4.8  | 0.0  | 0.0  | 0.0  | 1.7  | 10.5 |
| 18          |      |      |      |      |      |      | 6.7  | 1.2  | 0.9  | 2.8  | 1.5  | 0.0  |
| 19          | 0.0  | 0.0  | 0.0  | 0.0  | 1.3  | 2.3  | 0.0  | 0.0  | 2.9  | 1.4  | 0.0  | 8.3  |
| 20          | 3.8  | 1.4  | 2.8  | 2.2  | 0.0  | 3.3  | 3.0  | 0.0  | 1.5  | 0.0  | 1.6  |      |
| 21          |      |      |      |      |      | 0.0  | 0.0  | 0.0  | 0.0  | 2.6  | 6.6  | 0.0  |
| 22          |      |      |      |      |      |      |      | 4.4  | 0.0  | 14.3 | 0.0  |      |
| 23          | 0.0  | 2.3  | 0.0  | 4.2  | 2.2  | 0.0  | 0.0  | 0.0  | 0.0  | 3.3  | 2.0  | 3.9  |
| 24          | 0.0  | 0.0  | 0.0  | 0.0  | 0.0  | 1.9  | 1.1  | 0.0  | 0.9  | 1.0  | 2.3  | 0.0  |
| 25          | 2.8  | 0.0  | 1.0  | 0.0  | 0.0  | 1.3  | 0.0  | 2.7  | 0.0  | 0.0  | 0.0  | 3.9  |
| 26          | 0.0  | 0.0  | 0.0  | 7.1  | 0.0  | 0.0  | 0.0  | 0.0  | 0.0  | 0.0  | 0.0  | 0.0  |
| 27          |      |      |      | 0.0  | 8.3  | 0.0  | 4.2  | 0.0  | 0.0  | 0.0  | 8.7  | 18.2 |
| 28          | 0.0  | 0.0  | 0.0  | 0.0  | 0.0  | 0.0  | 0.0  | 0.0  | 0.0  | 0.0  | 11.1 | 0.0  |
| 29          | 0.0  | 0.0  | 2.1  | 0.0  | 0.0  | 9.1  | 0.0  | 0.0  | 0.0  | 0.0  | 0.0  | 60.0 |
| 30          | 4.2  | 0.0  | 0.0  | 0.0  | 0.0  | 3.9  | 1.6  | 0.0  | 1.7  | 0.0  | 6.1  | 4.6  |
| 31          | 0.0  | 0.0  | 0.0  | 2.2  | 0.0  | 0.0  | 1.5  | 0.0  | 0.0  | 0.0  | 0.0  | 0.0  |
| 32          | 1.1  | 0.9  | 1.2  | 4.4  | 0.0  | 1.6  | 3.8  | 2.4  | 10.3 | 8.3  | 7.5  | 22.7 |
| 33          |      |      |      |      |      | 12.5 | 0.0  | 0.0  | 0.0  | 37.5 | 16.7 | 0.0  |
| 34          | 1.3  | 0.0  | 0.0  | 0.0  | 1.2  | 2.1  | 0.0  | 0.0  | 0.0  | 0.0  | 3.5  | 0.0  |
| 35          | 0.0  | 0.0  | 1.7  | 0.0  | 0.0  | 0.0  | 0.0  | 0.0  | 0.0  | 0.0  | 4.0  |      |
| 36          | 0.0  | 2.4  | 0.0  | 0.0  | 0.0  | 3.0  | 0.0  | 0.0  | 2.4  | 5.3  | 44.6 | 50.0 |
| 37          | 0.8  | 0.8  | 0.0  | 0.0  | 12.7 | 4.6  | 0.0  | 2.8  | 0.0  | 3.6  | 0.0  | 0.0  |
| 38          | 0.0  | 0.0  | 1.6  | 1.6  | 1.4  | 1.3  | 0.0  | 1.6  | 1.5  | 1.4  | 11.7 | 30.3 |
| 39          | 0.0  | 0.0  | 0.0  | 2.3  | 4.4  | 0.0  | 2.4  | 0.0  | 3.5  | 3.5  | 10.3 | 13.3 |
| 40          | 1.5  | 0.5  | 0.0  | 0.5  | 0.0  | 2.6  | 8.1  | 13.9 | 18.1 | 23.9 | 44.6 |      |
| 41          | 0.0  | 2.0  | 1.3  | 0.0  | 2.1  | 0.0  | 1.7  | 6.1  | 1.9  | 21.2 | 43.2 | 46.5 |
| 42          | 0.0  | 0.0  | 6.5  | 0.0  | 0.0  | 2.1  | 2.9  | 0.0  | 0.0  | 0.0  | 0.0  | 10.0 |
| 43          |      |      |      |      |      |      |      | 17.1 | 20.0 | 0.0  | 5.3  | 17.2 |
| 44          | 4.3  | 4.4  | 2.0  | 8.3  | 2.9  | 0.0  | 0.0  | 8.7  | 3.2  | 0.0  | 3.9  | 0.0  |
| 45          | 0.0  | 1.0  | 0.0  | 0.0  | 0.0  | 1.4  | 6.1  | 28.2 | 32.9 | 35.8 | 35.8 | 65.6 |
| 46          | 2.0  | 0.0  | 0.0  | 0.0  | 0.0  | 0.0  | 0.0  | 1.6  | 1.3  | 1.6  | 5.2  | 4.1  |
| 47          | 0.0  | 0.0  | 0.0  | 0.0  | 0.0  | 0.0  | 0.0  | 51.6 | 74.6 | 69.6 | 82.2 | 84.0 |
| 48          | 1.1  | 0.5  | 0.0  | 0.0  | 1.9  | 0.5  | 2.4  | 4.8  | 1.9  | 1.7  | 9.9  | 19.4 |

(Title)Supplemental figure 4. Percent of Admissions Treated with Pharmacologic Thromboprophylaxis in Adolescents with SCD at 48 US Children’s Hospitals, Pediatric Health Information System, 2010 - 2021

**Legend for Supplemental Figure 4.** Heat map showing the percentage of admissions treated with pharmacologic prophylaxis, by hospital per year. NOTE: Blank cells represent either no qualifying hospital admissions for that year or no admission because the hospital was not part of PHIS yet. Color intensity correlates with frequency of thromboprophylaxis (white to red gradient where 0%=White and 100%=Red)
